# Supplementary material for: The encapsulation of CdS in carbon nanotubes for stable and efficient photocatalysis
Source: Royal Society of Chemistry journal article supplement (doi:10.1039/c4ta04549a), 2014-10-24
Supplement: c4ta04549a1.pdf [file c4ta04549a1.pdf]

## Supplementary data

### The Encapsulation of CdS into Carbon Nanotube for Stable and Efficient Photocatalysis

Xiaofeng Cui,<sup>#</sup> Yajun Wang,<sup>#</sup> Guiyuan Jiang,<sup>\*</sup> Zhen Zhao, Chunming Xu,<sup>\*</sup> Aijun Duan, Jian Liu,  
Yuechang Wei, Weikun Bai

State Key Laboratory of Heavy Oil Processing, China University of Petroleum, Beijing  
102249, China. [jianggy@cup.edu.cn](mailto:jianggy@cup.edu.cn), [xcm@cup.edu.cn](mailto:xcm@cup.edu.cn)

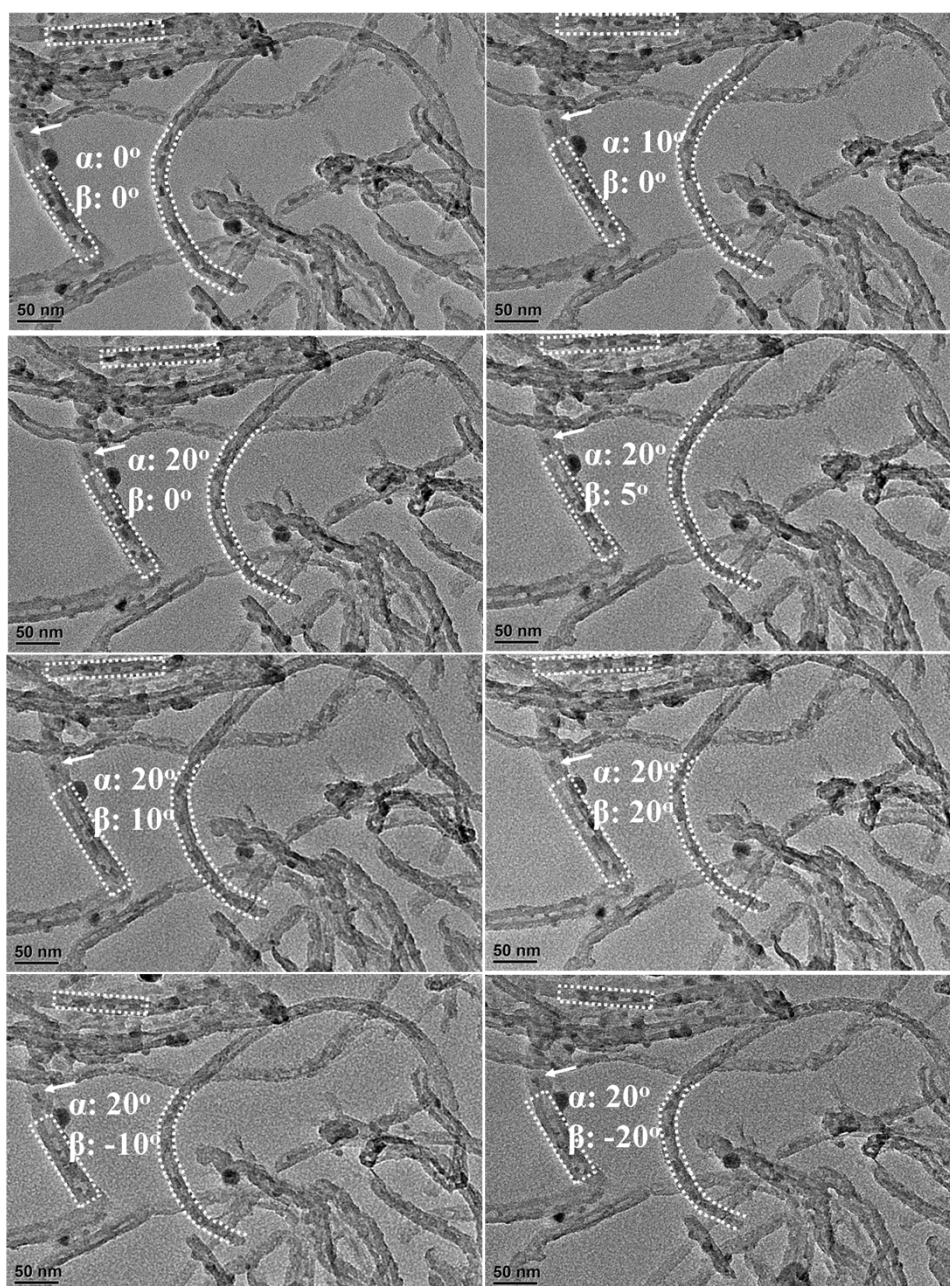

Fig. S1 TEM images of CdS filled CNTs (CdS-in-CNTs) under different rotation angle.

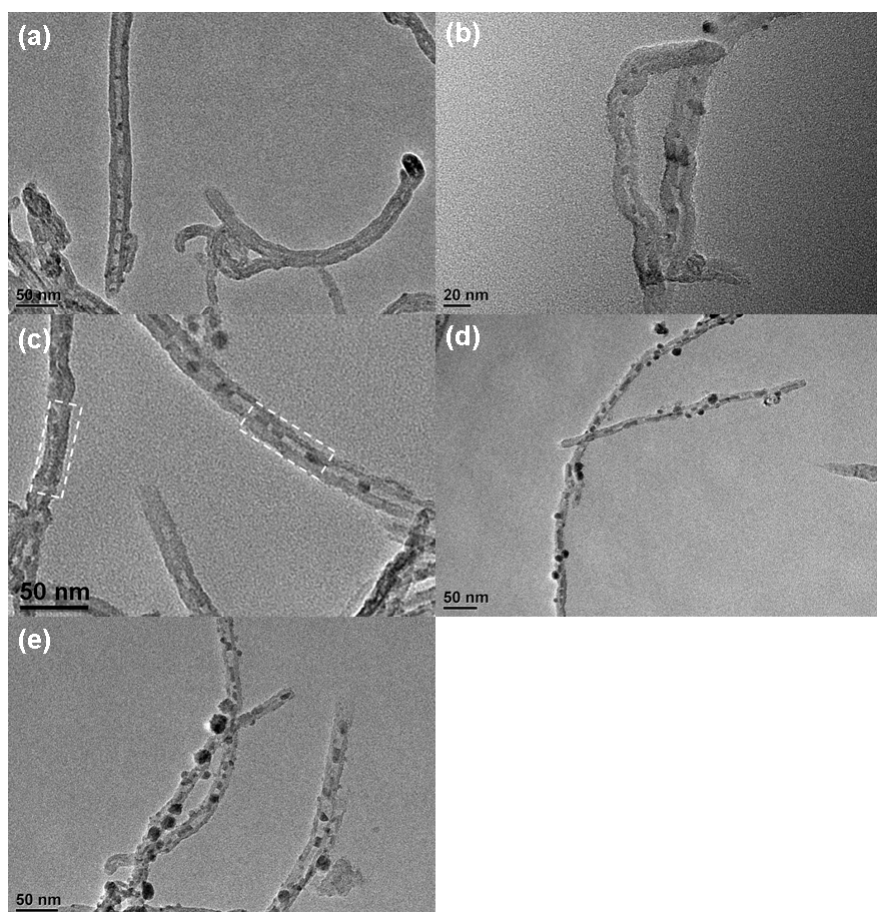

Fig. S2 TEM images of CdS-in-CNTs prepared by adding different amount of  $\text{Cd}(\text{Ac})_2$ , 1 mmol (a), 2 mmol(b), 5 mmol (c), 10 mmol (d) and 20 mmol (e)

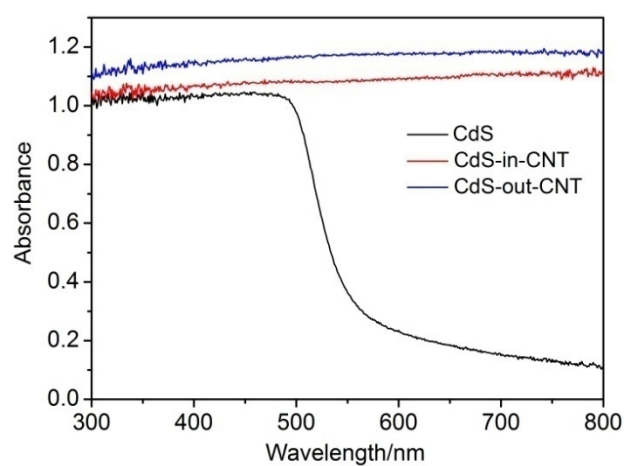

Fig. S3 UV-Vis DRS spectra of CdS, CdS-in-CNTs and CdS-out-CNTs



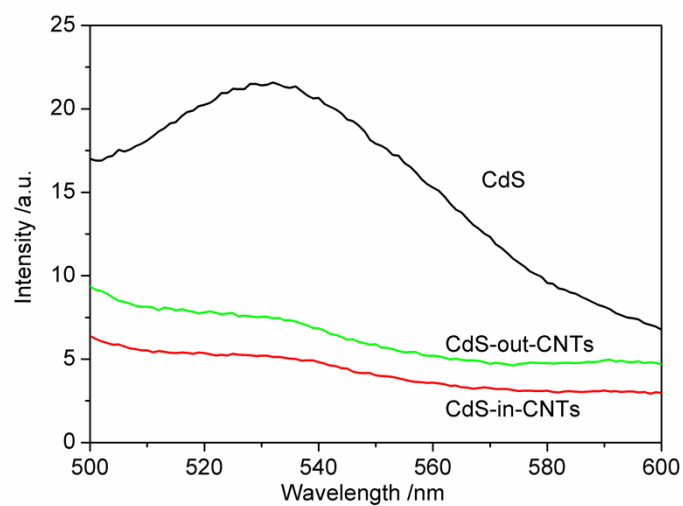

Fig.S4 PL spectra of CdS, CdS-in-CNTs and CdS-out-CNTs composite

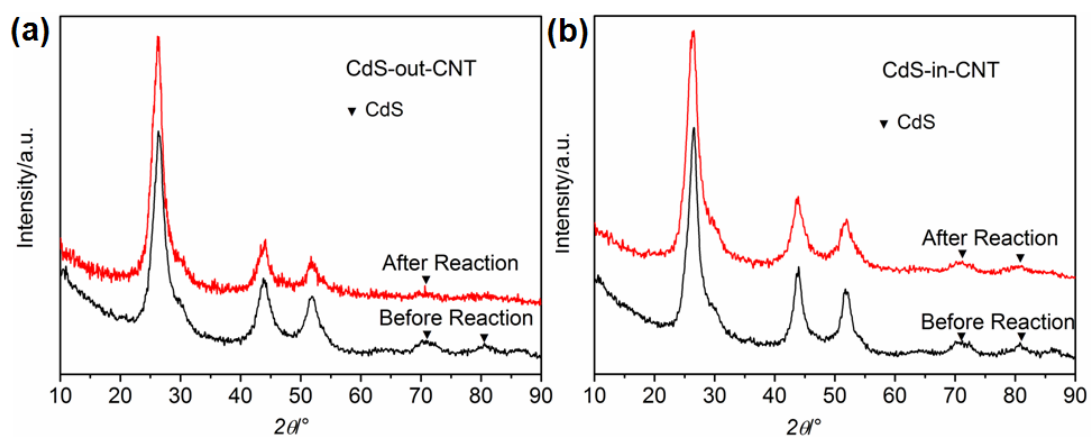

Fig. S5 XRD patterns of CdS-out-CNTs (a) and CdS-in-CNTs (b) after four reaction cycles

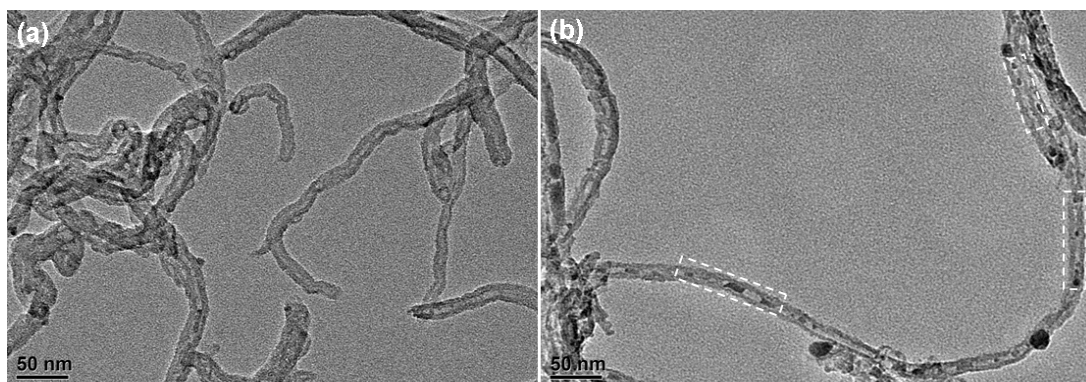

Fig. S6 TEM image of CdS-out-CNTs (a) and CdS-in-CNTs (b) after four reaction cycles

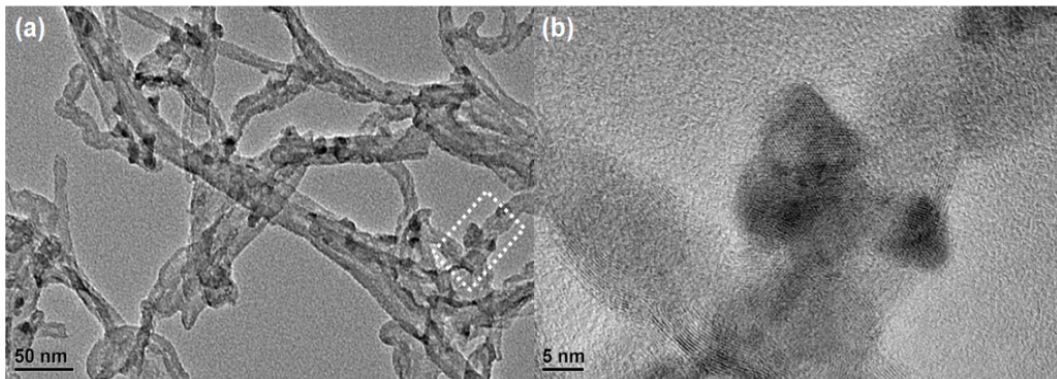

Fig. S7 TEM and HRTEM images of CdS-out-CNTs (a) large scale TEM image, (b) enlarged CdS particle

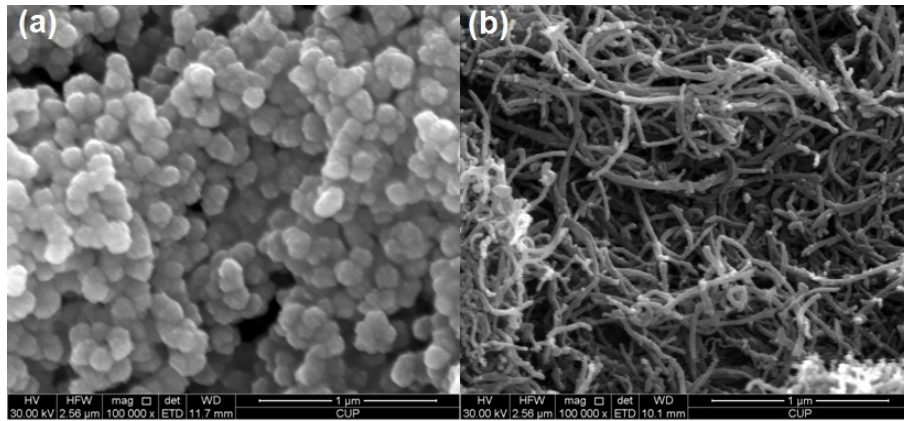

Fig. S8 SEM images of pure CdS (a) and CdS-in-CNTs (b)

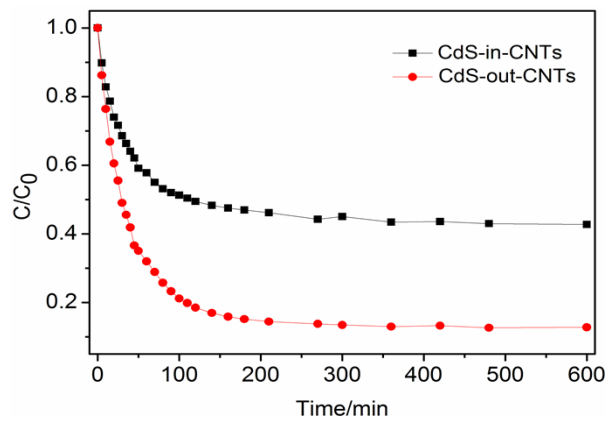

Fig. S9 Changes of MB concentration in CdS-in-CNTs and CdS-out-CNTs photocatalytic system in dark.
